# Supplementary material for: The association of indoxyl sulfate with fibroblast growth factor‐23 in cats with chronic kidney disease
Source: PubMed Central journal article supplement — J Vet Intern Med. 2019 Feb 18;33(2):686–93. doi: 10.1111/jvim.15457 (PMC6430881; doi:10.1111/jvim.15457), 2019-02-18
Supplement: JVIM-33-686-s001.pdf [file JVIM-33-686-s001.pdf]

## MBS047852 Cat Fibroblast Growth Factor 23 (FGF23) ELISA Kit

This kit is designed for **ACCESSION: XP\_011282059 ; FGF23 fibroblast growth factor 23 [ Felis catus (domestic cat) ]**

**Capture Antibody: Mouse monoclonal to FGF23; Immunogen: Recombinant full length protein of Cat FGF23.**

**Detection Antibody: Rabbit polyclonal to FGF23; Immunogen: Synthetic peptide conjugated to KLH derived from within residues 150 - 245 of Cat FGF 23.**

**Standard: A recombinant full length Cat protein by E.coli.**

### PRECISION

#### Intra-assay Precision (Precision within an assay)

Three samples of known concentration were tested twenty times on one plate to assess intra-assay precision.

#### Inter-assay Precision (Precision between assays)

Three samples of known concentration were tested in six separate assays to assess inter-assay precision

| Sample             | Intra-Assay Precision |      |       | Inter-Assay Precision |      |       |
|--------------------|-----------------------|------|-------|-----------------------|------|-------|
|                    | 1                     | 2    | 3     | 1                     | 2    | 3     |
| n                  | 20                    | 20   | 20    | 6                     | 6    | 6     |
| Mean (pg/ml)       | 19.9                  | 48.3 | 124.0 | 24.2                  | 59.6 | 138.9 |
| Standard deviation | 1.2                   | 1.9  | 4.0   | 1.0                   | 2.1  | 6.1   |
| CV (%)             | 6.0                   | 3.9  | 3.2   | 4.1                   | 3.6  | 4.4   |

### RECOVERY

The spike recovery was evaluated by spiking 3 levels of FGF23 into five health Cat serum samples. The un-spiked serum was used as blank in these experiments.

The recovery ranged from 81% to 100 % with an overall mean recovery of 92 %.

### SAMPLE VALUES

Serum/Plasma – Thirty samples from apparently healthy Cat were evaluated for the presence of FGF23 in this assay.

| Sample Type           | Mean (pg/ml) | Range (pg/ml) |
|-----------------------|--------------|---------------|
| Serum (n=35)          | 220          | 85-320        |
| EDTA plasma (n=35)    | 186          | 55-245        |
| Heparin plasma (n=35) | 185          | 52-260        |
